# Supplementary material
Source: publisher site journal article supplement (https://www.dovepress.com/article/225288)

**Supplementary Data**

**Figure S1** The promoter region and transcription start site of the *bla*PAU-1 gene.


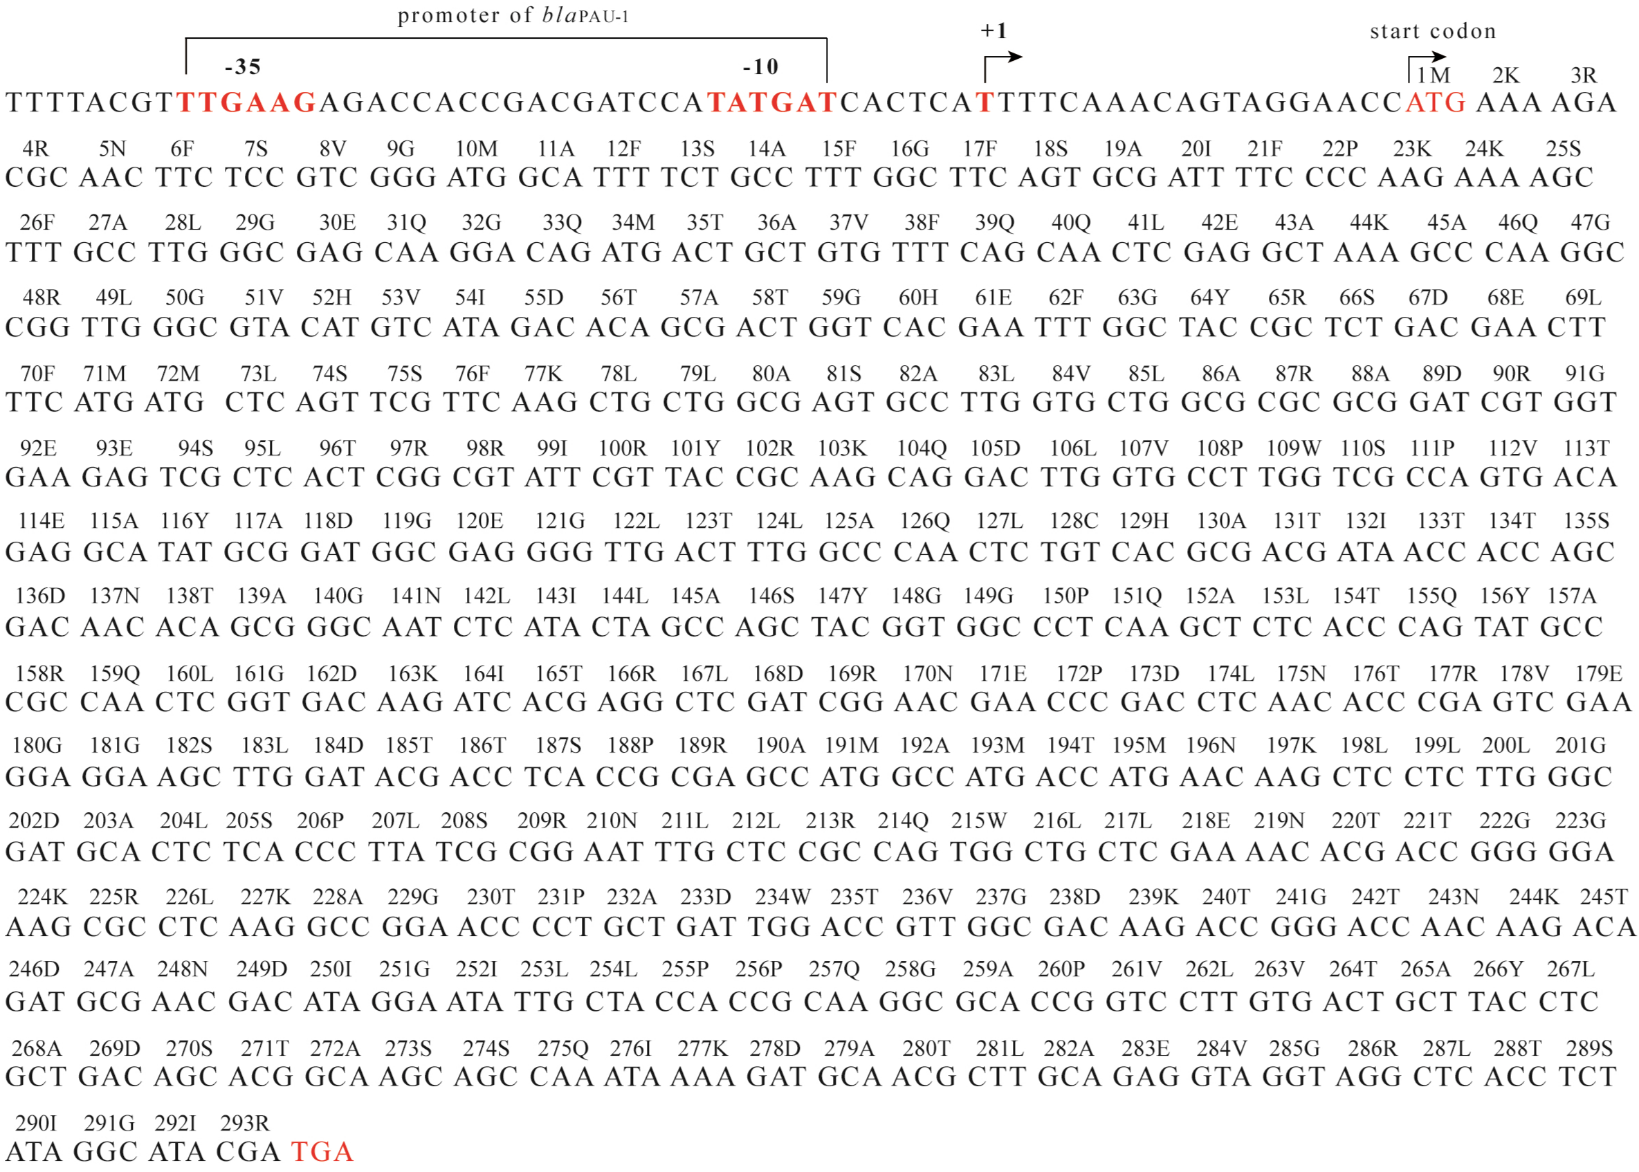


**Figure S2** SDS-PAGE result of PAU-1.


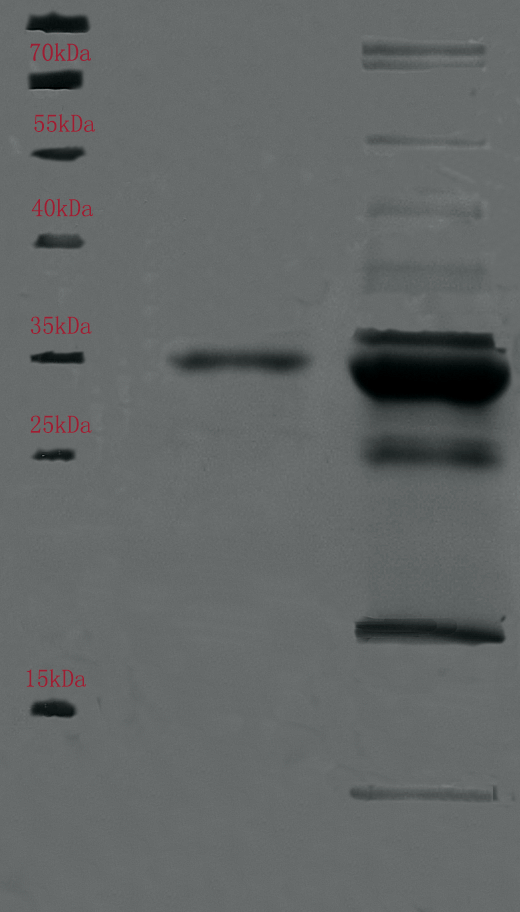


**Figure S3** Multiple sequence alignment of PAU-1, the closest relative of PAU-1, and the two representatives of class A β-lactamases, BKC-1 and CTX-M-9.


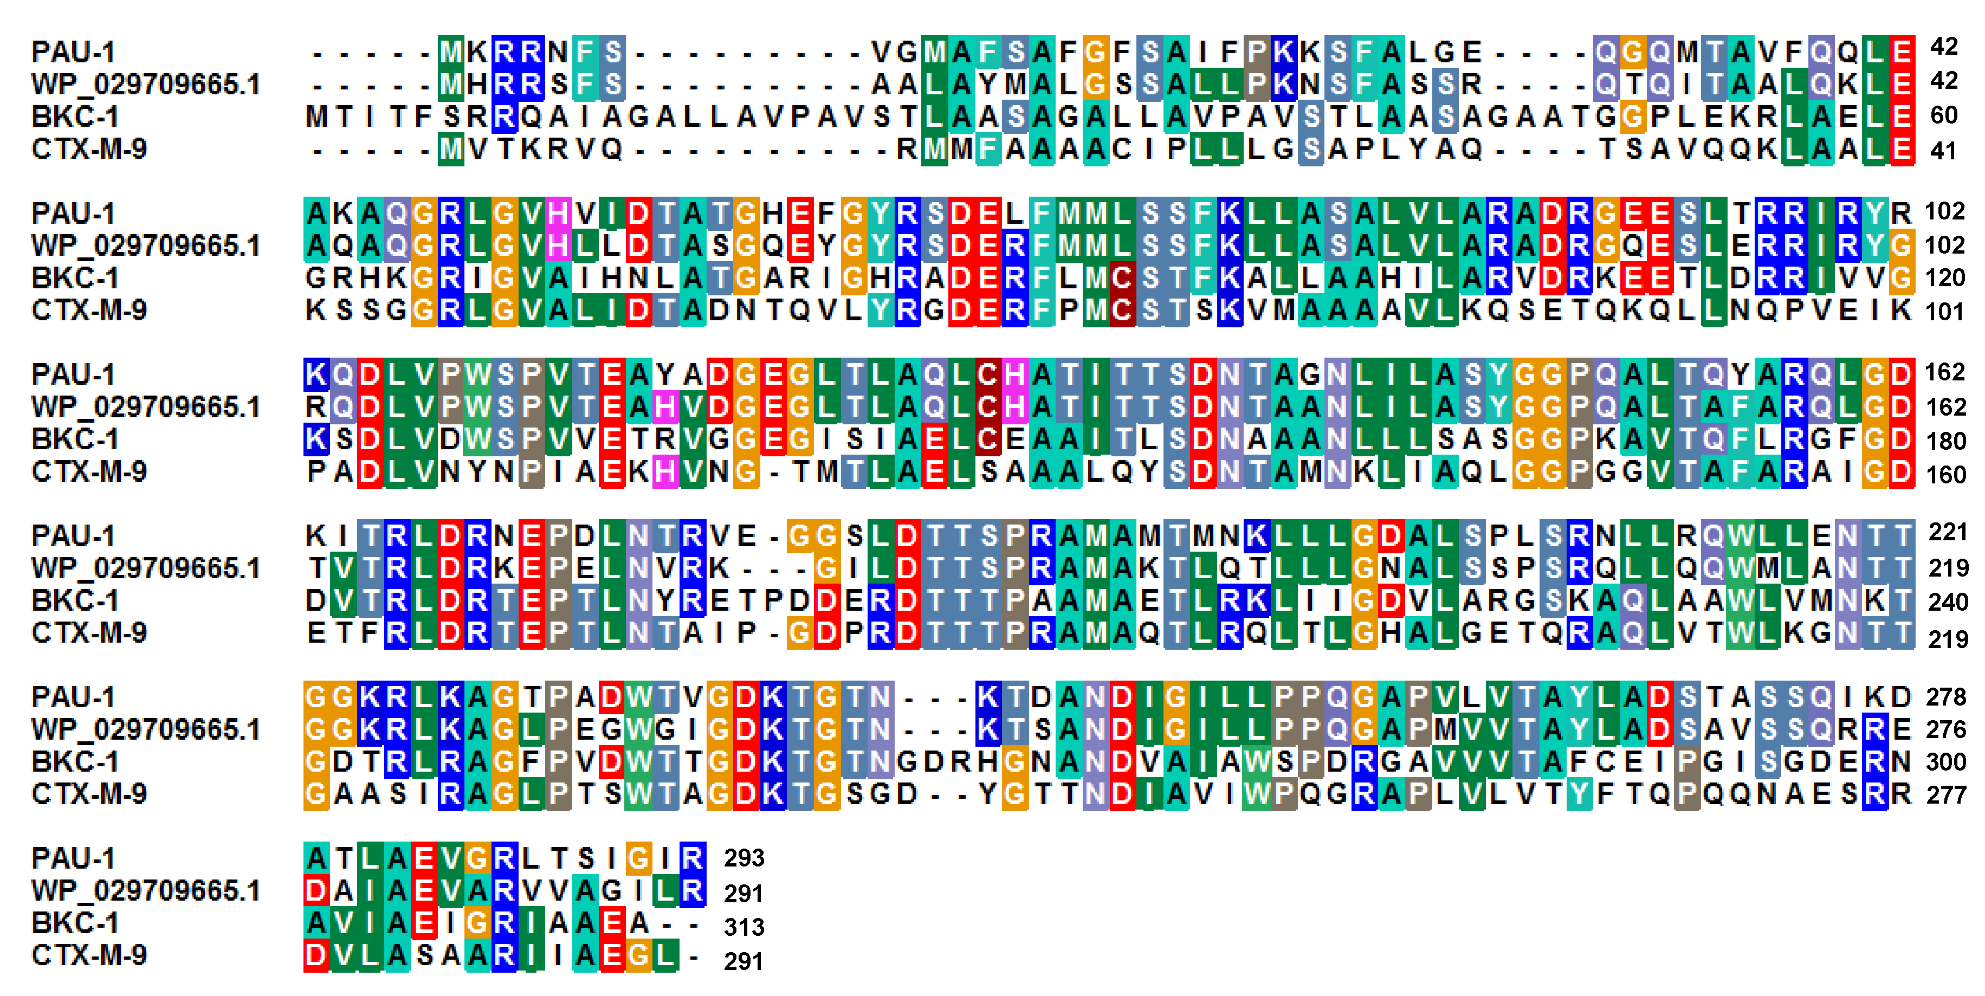

Supplement: Supplementary file 1 [file get_supplementary_file.php]
